# Supplementary material for: Influence of Infant and Young Child Feeding Practices on Stunting in Children Aged 6 – 23 Months in Zambia&nbsp;
Source: Research Square preprint supplement (doi:10.21203/rs.3.rs-333111/v1), 2021-03-22
Supplement: Supplementary file 1 [file 73481b59ea1eca1c65f50ca4.docx]

Appendices:

**Child Nutritional Concurrent Problems & Short Term Consequences**

**Long-term Consequences**

**Health Outcomes**

Increased Morbidity

Increased Mortality

**Child Development and Growth**

Low Cognitive

Language

**Economic**

Increased Health Expenditure

The increased opportunity cost for mothers caring for sick children

**Health Outcomes**

Adult NCDs

Obesity and associated comorbidities

Reproductive Health

**Child Development and Growth**

Low Learning outcomes

Learning capacity unachieved potential

**Economic**

Low work capacity

Work productivity

Labour force participation

**Stunted, Wasting and Under-weight Growth**

**Household Level Factors**

**Feeding Practices**

**Hygiene and Infection Control**

**Breastfeeding**

**Maternal Factors**

Preconception Poor nutrition, pregnancy, lactation

Adolescent pregnancy, preterm birth, short birth interval

**HH Setting**

Low child stimulate activity

Poor care practices

Sanitation

Food security

Low caregiver education, wealth

**Food and Dietary Diversity**

Low micronutrient quality

Low dietary diversity and intake

**Feeding Practices**

Infrequent feeding

Inadequate feeding (during and after illness)

Insufficient quantities

**Food and Water Safety**

Water sources

Hygiene practices

Preparation Storage

**Breastfeeding Practices**

Delayed initiation

Non-exclusive feeding

Early cessation

Complimentary feeding

**Childhood Diseases**

**Infection**

Diarrheal disease

Fever and respiratory infections

Malaria

**Community and Societal Factors**

**Political Economy**

Policies, financial services, poverty, income, wealth, employment, livelihoods

**Health and Healthcare**

Access to healthcare

Health systems, infrastructure, policies

**Education**

Quality education

Qualified teachers

Health educators, research, infrastructure, training institutions

**Society and Culture**

Norms and beliefs

Social support network

Power relations

**Agriculture and Food Security**

Food production and processing

Availability

Food safety and quality

**Water, Sanitation and Environment**

Water and sanitation

Infrastructure

Population distribution and density, disasters

***Consequences***

***Causes***

***Contextual Issues***

A: WHO Conceptual Framework for Childhood Stunting (adjusted*)
